# Supplementary material for: Reducing-agent-free facile preparation of Rh-nanoparticles uniformly anchored on onion-like fullerene for catalytic applications
Source: Royal Society of Chemistry journal article supplement (doi:10.1039/c9ra09244g), 2020-01-01
Supplement: c9ra09244g1.pdf [file c9ra09244g1.pdf]

## **Supporting Information**

# **Reducing-agent-free facile preparation of Rh-nanoparticles uniformly anchored on onion-like fullerene for catalytic applications**

Mayakrishnan Gopiraman,<sup>1</sup> Somasundaram Saravanamoorthy,<sup>2</sup> Sana Ullah,<sup>3</sup> Andivelu Ilangovan,<sup>2</sup> Ick Soo Kim,<sup>3</sup> Ill Min Chung<sup>1,\*</sup>

*<sup>1</sup>Department of Applied Bioscience, College of Life & Environment Science, Konkuk University, 120 Neungdong-ro, Gwangjin-gu, Seoul 05029, South Korea*

*<sup>2</sup>School of Chemistry, Bharathidasan University, Tiruchirappalli, 620 024, Tamil Nadu, India*

*<sup>3</sup>Nano Fusion Technology Research Group, Division of Frontier Fibers, Institute for Fiber Engineering (IFES), Interdisciplinary Cluster for Cutting Edge Research (ICCER), Shinshu University, Tokida 3-15-1, Ueda, Nagano Prefecture 386-8567, Japan*

\*Corresponding author. Tel.: +82 02 450 3730; fax: +82 02 446 7856.

E-mail addresses: [illminchung@gmail.com](mailto:illminchung@gmail.com) (I.M. Chung).

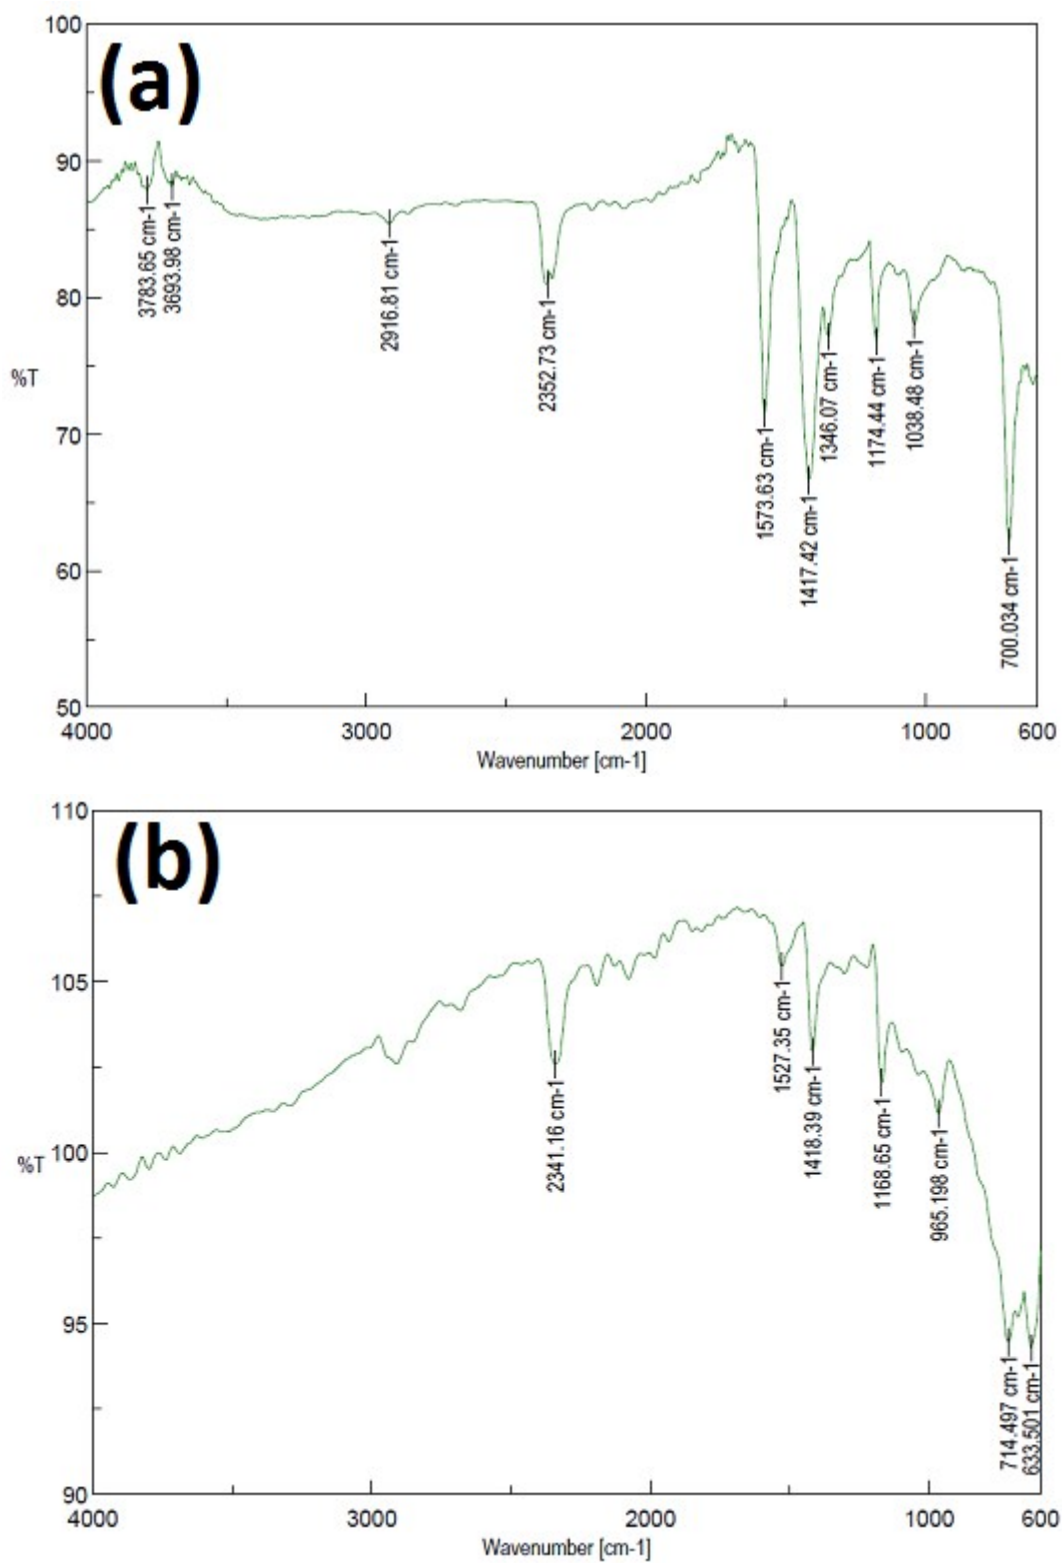

**Fig. S1.** FT-IR spectra of (a) carbon Fullerene-C60 and (b) Rh(0)NPs/Fullerene-C60.

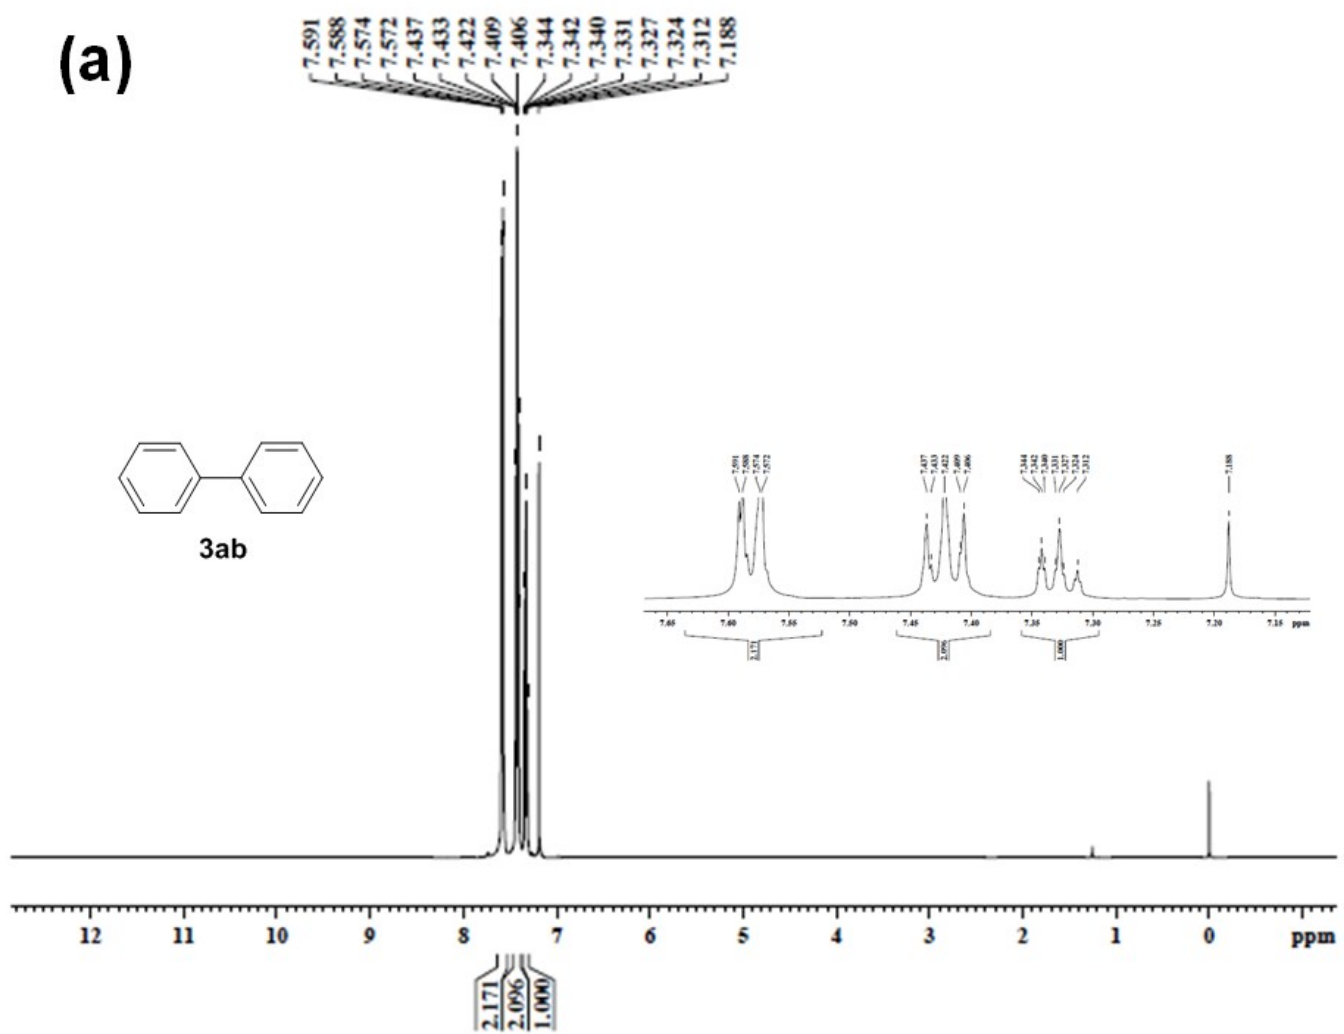

Fig. S2.  $^1\text{H}$  NMR spectra of biphenyl (**3ab**).

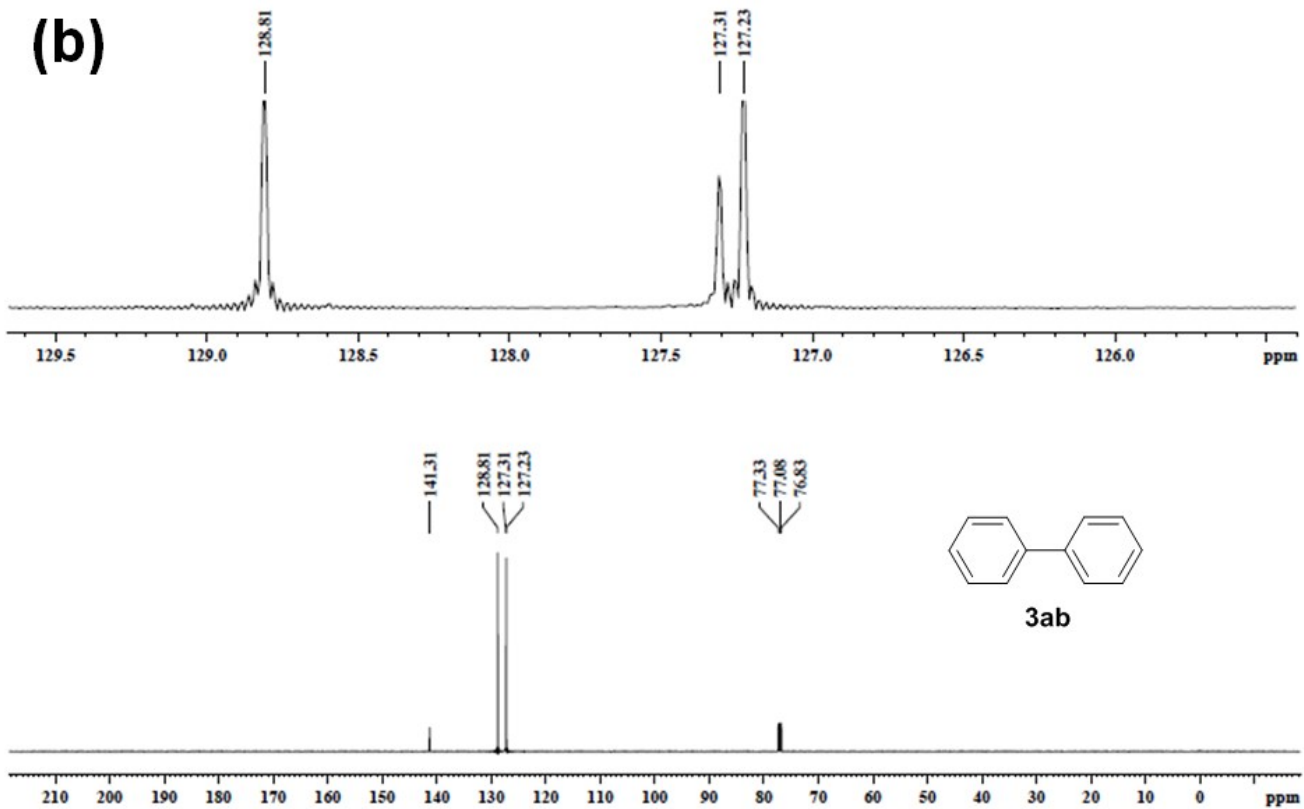

**Fig. S3.**  $^{13}\text{C}$  NMR spectra of biphenyl (**3ab**).
